# Supplementary material for: Structural variation from heterometallic heptanuclear or heptanuclear to cubane clusters based on 2-hydroxy-3-ethoxy-benzaldehyde: effects of pH and temperature
Source: Royal Society of Chemistry journal article supplement (doi:10.1039/c4ra09687h), 2014-01-01
Supplement: c4ra09687h1.pdf [file c4ra09687h1.pdf]

## Structural variation from Heterometallic Heptanuclear, Heptanuclear to Cubane Clusters based on 2-hydroxy-3-ethoxy-benzaldehyde : Effects of pH value and Temperature

Shu-Hua Zhang,<sup>a,\*</sup> Ru-Xia Zhao,<sup>a</sup> Gui Li,<sup>a</sup> Hai-Yang Zhang,<sup>a</sup> Chun-Lian Zhang,  
<sup>a</sup> Gilles Muller<sup>b,\*</sup>

<sup>a</sup>College of Chemistry and Bioengineering, Guilin University of Technology, Guilin, People's Republic of China.

541004, email: [zsh720108@163.com](mailto:zsh720108@163.com) Telephone: +86 773 589 6839, Fax: +86 773 589 6839 (S. H. Zhang)

<sup>b</sup>Department of Chemistry, San José State University, One Washington Square, San José, CA 95192-0101, USA.

email: [gilles.muller@sjsu.edu](mailto:gilles.muller@sjsu.edu), Telephone: 408 924 5000, Fax: 408 924 4945 (G. Muller).

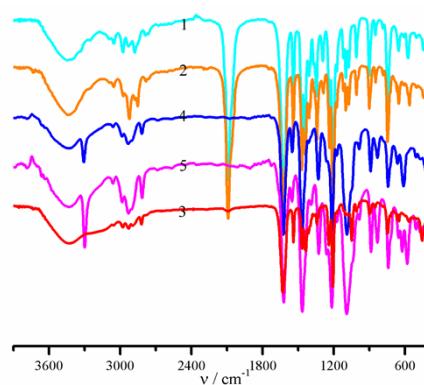

Figure S1. IR of 1-5.

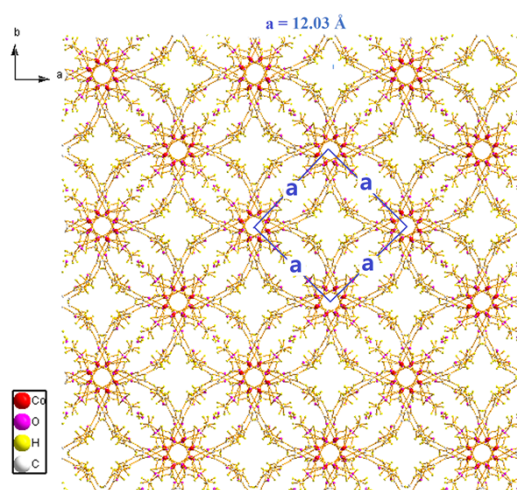

Figure S2. Packing drawing of 3.

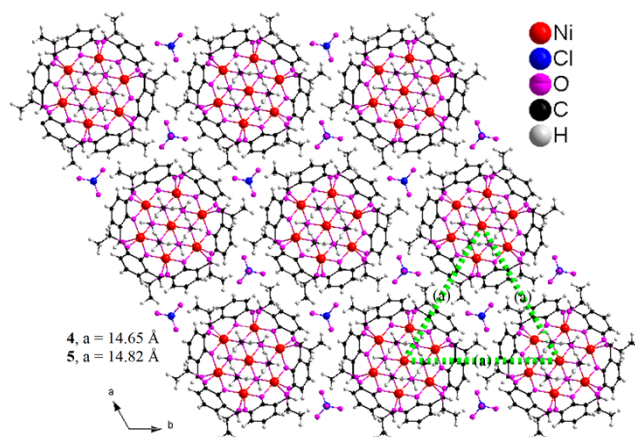

**Figure S3.** Packing drawing of **4** and **5**.

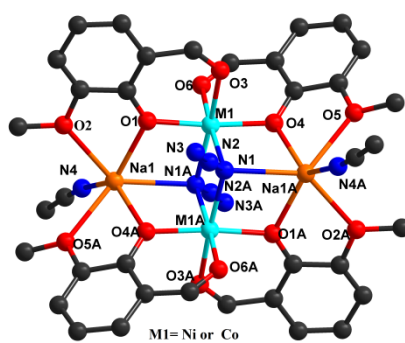

**Figure S4.** Structures of **a** and **b** where solvent molecules and all hydrogen atoms have been omitted for clarity.

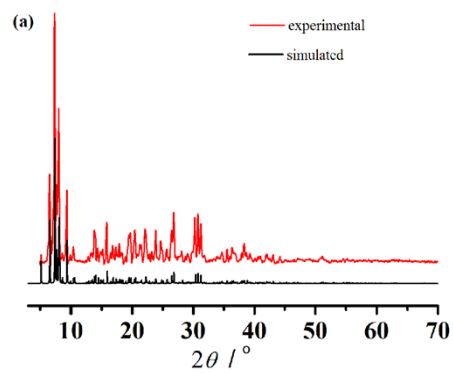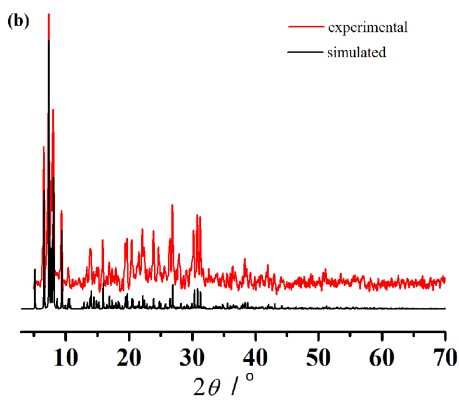

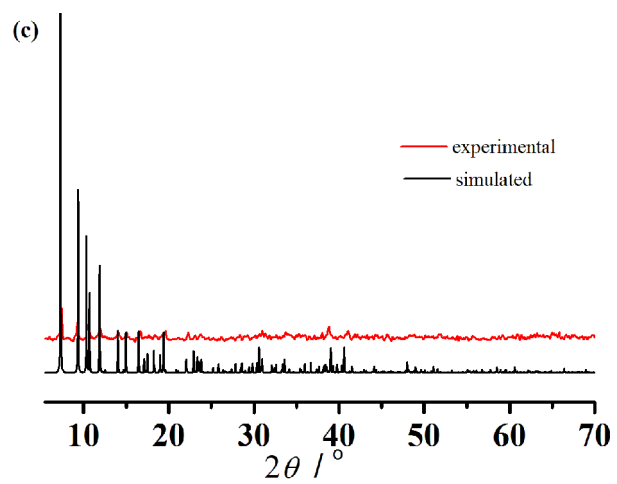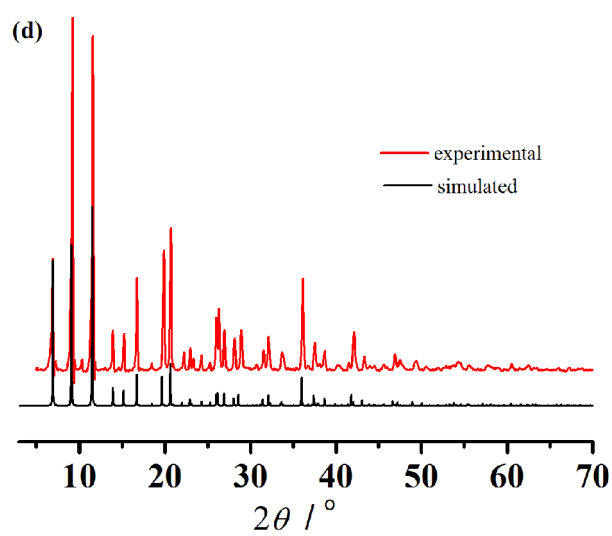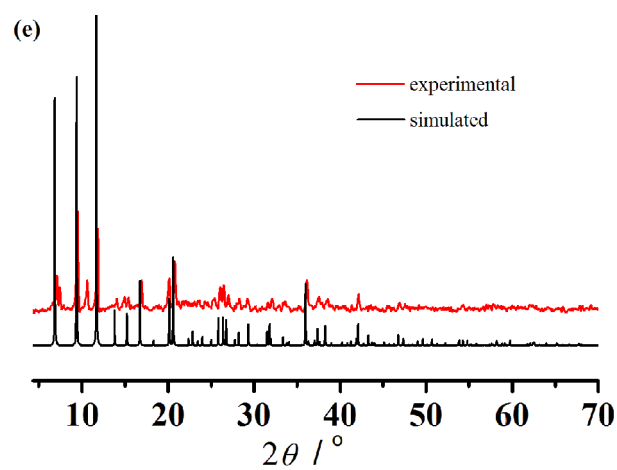

Figure S5. XRD and simulation XRD of 1 (a), 2 (b), 3 (c), 4 (d), and 5(e).

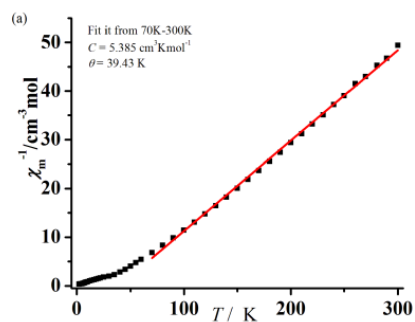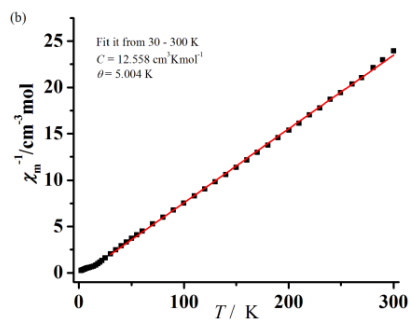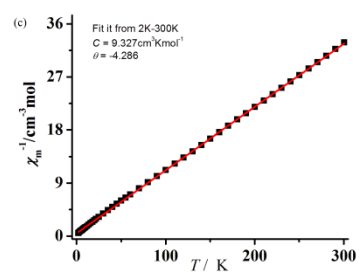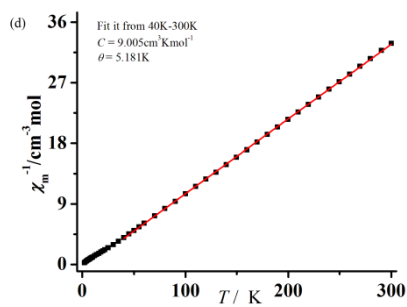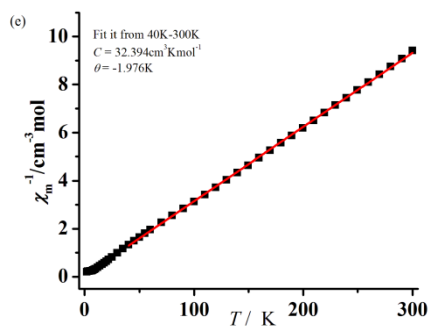

**Figure S6.** Plot of  $\chi_M^{-1}$  vs  $T$  of 1 (a), 2 (b), 3 (c), 4 (d), and 5(e). The solid lines represent the best fit.

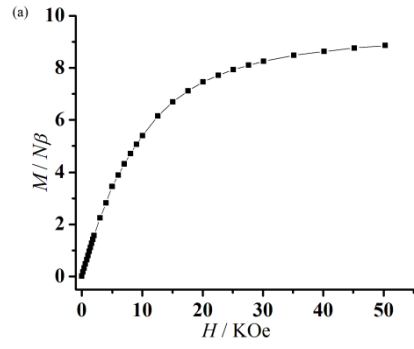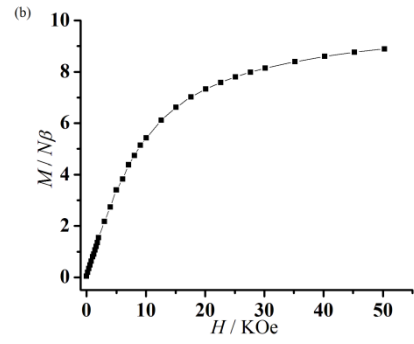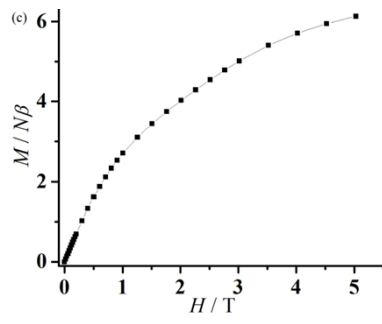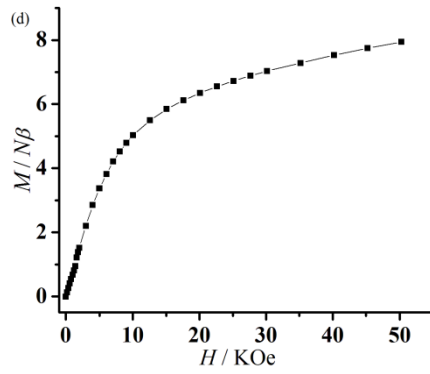

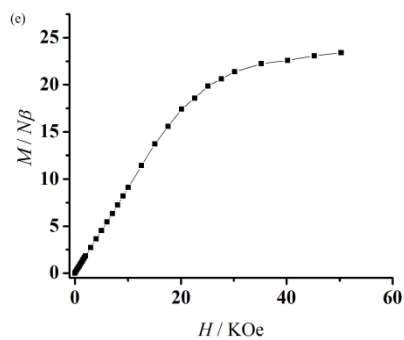

Figure S7. Field dependence of magnetization for 1 (a), 2 (b), 3 (c), 4 (d), and 5(e) at 2 K.

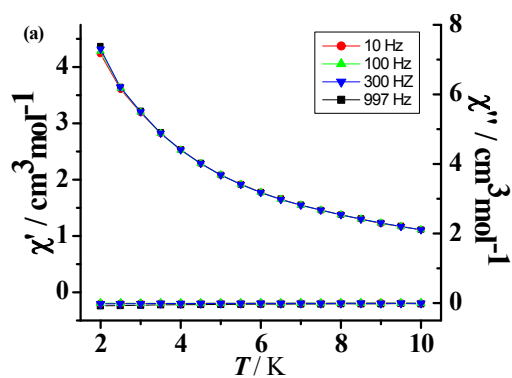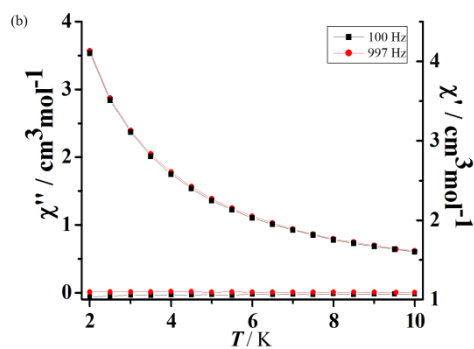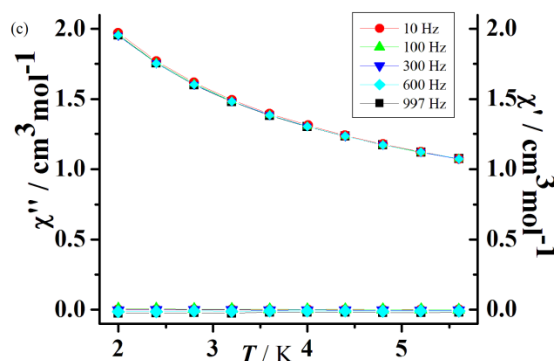

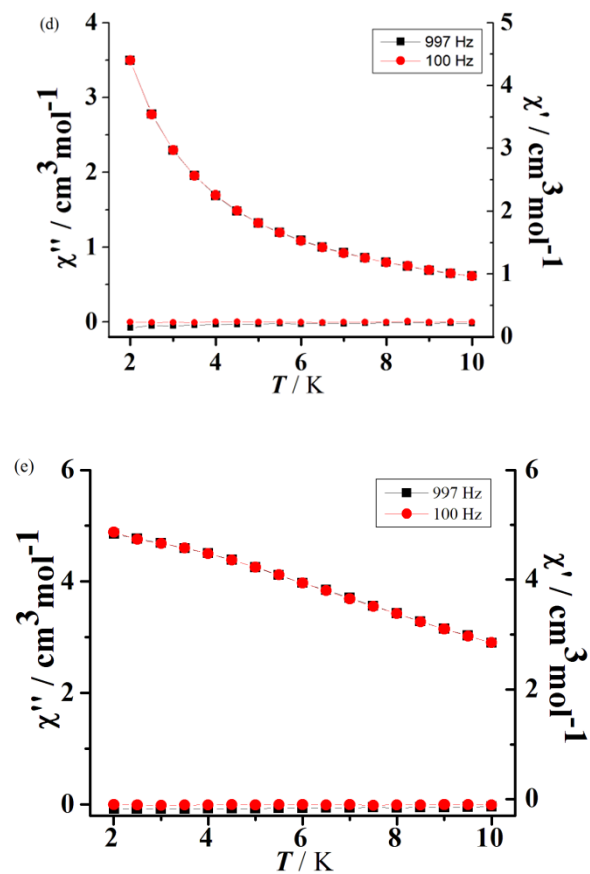

Figure S8. Curves of  $\chi''$  and  $\chi'$  vs  $T$  of **1** (a), **2** (b), **3** (c), **4** (d), and **5**(e).

Table S1. Metal–Ligand Bond Lengths ( $\text{\AA}$ ) and Angles ( $^\circ$ ) in Complexes **1** and **2**.

| Complexes <sup>i</sup> | <b>1</b> | <b>2</b> |
|------------------------|----------|----------|
| N1-N2                  | 1.180(5) | 1.178(7) |
| N1-M2                  | 2.096(4) | 2.143(4) |
| N1-M1                  | 2.127(4) | 2.158(4) |
| N1-Na3                 | 2.563(4) | 2.548(5) |
| N2-N3                  | 1.133(7) | 1.142(8) |
| N4-N5                  | 1.176(5) | 1.170(6) |
| N4-M1                  | 2.129(3) | 2.165(4) |
| N4-M3                  | 2.134(4) | 2.187(4) |
| N4-Na1                 | 2.551(4) | 2.524(4) |
| N5-N6                  | 1.146(6) | 1.143(8) |
| N7-N8                  | 1.175(5) | 1.182(6) |
| N7-M4                  | 2.113(3) | 2.158(4) |
| N7-M1                  | 2.138(4) | 2.174(4) |
| N7-Na2                 | 2.512(4) | 2.498(5) |
| N8-N9                  | 1.143(6) | 1.136(8) |
| N10-N11                | 1.190(5) | 1.193(6) |
| N10-M2                 | 2.108(4) | 2.145(4) |

---

|             |            |            |
|-------------|------------|------------|
| N10-M1      | 2.132(4)   | 2.167(4)   |
| N10-Na1     | 2.563(4)   | 2.539(5)   |
| N11-N12     | 1.126(6)   | 1.142(7)   |
| N13-N14     | 1.192(5)   | 1.181(6)   |
| N13-M1      | 2.107(3)   | 2.143(4)   |
| N13-M4      | 2.108(4)   | 2.174(4)   |
| N13-Na3     | 2.560(4)   | 2.538(5)   |
| N14-N15     | 1.154(6)   | 1.143(7)   |
| N16-N17     | 1.191(5)   | 1.194(6)   |
| N16-M3      | 2.119(3)   | 2.155(4)   |
| N16-M1      | 2.130(4)   | 2.179(4)   |
| N16-Na2     | 2.548(4)   | 2.526(4)   |
| N17-N18     | 1.142(6)   | 1.133(7)   |
| Na1-O1      | 2.244(4)   | 2.277(4)   |
| Na1-O16     | 2.251(4)   | 2.267(4)   |
| Na1-O18     | 2.414(4)   | 2.403(4)   |
| Na1-O3      | 2.470(4)   | 2.467(5)   |
| Na2-O13     | 2.237(3)   | 2.259(4)   |
| Na2-O10     | 2.252(3)   | 2.275(4)   |
| Na2-O15     | 2.429(4)   | 2.427(5)   |
| Na2-O12     | 2.451(4)   | 2.453(5)   |
| Na3-O7      | 2.233(4)   | 2.246(4)   |
| Na3-O4      | 2.237(4)   | 2.267(4)   |
| Na3-O9      | 2.412(4)   | 2.390(5)   |
| Na3-O6      | 2.453(4)   | 2.458(6)   |
| M2-O1       | 2.005(3)   | 2.026(4)   |
| M2-O4       | 2.020(3)   | 2.043(4)   |
| M2-O2       | 2.050(4)   | 2.098(4)   |
| M2-O5       | 2.061(4)   | 2.105(5)   |
| M3-O13      | 1.992(3)   | 2.021(4)   |
| M3-O16      | 2.009(3)   | 2.026(4)   |
| M3-O14      | 2.047(3)   | 2.078(4)   |
| M3-O17      | 2.055(4)   | 2.114(4)   |
| M4-O10      | 1.999(3)   | 2.029(4)   |
| M4-O7       | 2.019(3)   | 2.038(4)   |
| M4-O11      | 2.039(3)   | 2.080(4)   |
| M4-O8       | 2.062(4)   | 2.100(4)   |
| N3-N2-N1    | 177.3(7)   | 176.3(8)   |
| N6-N5-N4    | 176.4(6)   | 176.2(7)   |
| N9-N8-N7    | 179.1(7)   | 179.2(9)   |
| N12-N11-N10 | 177.0(6)   | 177.8(7)   |
| N15-N14-N13 | 176.4(6)   | 176.0(7)   |
| N18-N17-N16 | 177.3(6)   | 176.4(7)   |
| O1-Na1-O16  | 160.17(14) | 163.41(16) |
| O1-Na1-O18  | 124.00(15) | 122.63(17) |
| O16-Na1-O18 | 67.43(13)  | 67.39(14)  |
| O1-Na1-O3   | 67.20(13)  | 66.94(16)  |
| O16-Na1-O3  | 126.98(14) | 124.75(17) |
| O18-Na1-O3  | 110.73(14) | 109.25(17) |

---



---

|             |            |            |
|-------------|------------|------------|
| O1-Na1-N4   | 91.87(14)  | 92.99(15)  |
| O16-Na1-N4  | 72.82(13)  | 74.21(14)  |
| O18-Na1-N4  | 139.09(15) | 140.61(16) |
| O3-Na1-N4   | 100.46(14) | 99.40(16)  |
| O1-Na1-N10  | 72.92(13)  | 74.31(15)  |
| O16-Na1-N10 | 90.29(13)  | 91.90(15)  |
| O18-Na1-N10 | 97.18(13)  | 97.32(16)  |
| O3-Na1-N10  | 139.44(14) | 140.57(16) |
| N4-Na1-N10  | 73.35(12)  | 75.04(14)  |
| O13-Na2-O10 | 162.87(16) | 165.59(17) |
| O13-Na2-O15 | 67.56(12)  | 67.31(14)  |
| O10-Na2-O15 | 125.60(14) | 123.88(16) |
| O13-Na2-O12 | 121.11(14) | 120.10(16) |
| O10-Na2-O12 | 67.87(12)  | 67.29(14)  |
| O15-Na2-O12 | 109.05(15) | 108.71(17) |
| O13-Na2-N7  | 93.69(14)  | 94.66(16)  |
| O10-Na2-N7  | 73.50(13)  | 74.90(15)  |
| O15-Na2-N7  | 102.67(14) | 101.36(16) |
| O12-Na2-N7  | 139.57(13) | 140.52(16) |
| O13-Na2-N16 | 72.49(12)  | 73.69(15)  |
| O10-Na2-N16 | 92.93(13)  | 94.07(15)  |
| O15-Na2-N16 | 139.81(13) | 140.79(16) |
| O12-Na2-N16 | 94.82(14)  | 93.90(15)  |
| N7-Na2-N16  | 75.40(13)  | 77.47(14)  |
| O7-Na3-O4   | 161.66(15) | 164.88(17) |
| O7-Na3-O9   | 67.95(14)  | 68.17(16)  |
| O4-Na3-O9   | 124.91(17) | 122.42(18) |
| O7-Na3-O6   | 125.55(15) | 123.51(18) |
| O4-Na3-O6   | 66.74(14)  | 66.62(17)  |
| O9-Na3-O6   | 106.05(15) | 105.22(19) |
| O7-Na3-N13  | 72.86(13)  | 74.65(14)  |
| O4-Na3-N13  | 92.33(14)  | 93.29(15)  |
| O9-Na3-N13  | 140.52(16) | 142.50(18) |
| O6-Na3-N13  | 100.24(14) | 99.01(18)  |
| O7-Na3-N1   | 91.23(14)  | 92.58(16)  |
| O4-Na3-N1   | 73.66(13)  | 75.06(16)  |
| O9-Na3-N1   | 103.26(14) | 102.43(18) |
| O6-Na3-N1   | 139.47(15) | 140.66(17) |
| N13-Na3-N1  | 72.53(13)  | 74.02(15)  |
| N13-M1-N1   | 91.37(15)  | 90.79(17)  |
| N13-M1-N4   | 171.86(16) | 173.85(16) |
| N1-M1-N4    | 94.18(15)  | 93.52(16)  |
| N13-M1-N16  | 95.15(14)  | 94.95(16)  |
| N1-M1-N16   | 171.59(14) | 172.81(16) |
| N4-M1-N16   | 79.92(14)  | 81.12(15)  |
| N13-M1-N10  | 95.32(14)  | 94.28(16)  |
| N1-M1-N10   | 79.25(15)  | 80.51(17)  |
| N4-M1-N10   | 91.56(14)  | 90.76(16)  |
| N16-M1-N10  | 94.83(14)  | 94.71(16)  |

---

---

|            |            |            |
|------------|------------|------------|
| N13-M1-N7  | 79.32(14)  | 81.04(16)  |
| N1-M1-N7   | 93.49(15)  | 92.74(16)  |
| N4-M1-N7   | 94.39(14)  | 94.36(16)  |
| N16-M1-N7  | 92.93(15)  | 92.44(16)  |
| N10-M1-N7  | 170.94(14) | 171.78(16) |
| O1-M2-O4   | 176.35(15) | 174.46(16) |
| O1-M2-O2   | 88.83(14)  | 86.98(18)  |
| O4-M2-O2   | 89.12(15)  | 89.86(18)  |
| O1-M2-O5   | 89.81(15)  | 90.16(19)  |
| O4-M2-O5   | 87.34(15)  | 85.72(18)  |
| O2-M2-O5   | 94.81(16)  | 97.22(19)  |
| O1-M2-N1   | 93.99(15)  | 95.31(17)  |
| O4-M2-N1   | 89.11(14)  | 89.27(16)  |
| O2-M2-N1   | 92.15(16)  | 90.65(18)  |
| O5-M2-N1   | 172.13(16) | 170.65(19) |
| O1-M2-N10  | 88.37(13)  | 88.66(16)  |
| O4-M2-N10  | 94.05(14)  | 95.12(17)  |
| O2-M2-N10  | 171.93(15) | 170.50(19) |
| O5-M2-N10  | 92.75(15)  | 91.23(17)  |
| N1-M2-N10  | 80.50(14)  | 81.35(17)  |
| O13-M3-O16 | 179.23(13) | 178.54(16) |
| O13-M3-O14 | 88.69(13)  | 87.19(15)  |
| O16-M3-O14 | 90.67(13)  | 91.46(16)  |
| O13-M3-O17 | 91.34(15)  | 93.07(17)  |
| O16-M3-O17 | 88.26(14)  | 86.42(16)  |
| O14-M3-O17 | 91.79(15)  | 92.11(18)  |
| O13-M3-N16 | 87.33(13)  | 87.04(15)  |
| O16-M3-N16 | 93.36(14)  | 94.37(16)  |
| O14-M3-N16 | 171.88(15) | 171.30(17) |
| O17-M3-N16 | 95.38(14)  | 94.69(17)  |
| O13-M3-N4  | 93.18(15)  | 93.80(16)  |
| O16-M3-N4  | 87.28(13)  | 86.81(15)  |
| O14-M3-N4  | 93.10(14)  | 92.73(17)  |
| O17-M3-N4  | 173.42(15) | 171.77(17) |
| N16-M3-N4  | 80.07(14)  | 81.17(15)  |
| O10-M4-O7  | 177.15(12) | 176.30(15) |
| O10-M4-O11 | 88.36(14)  | 86.85(16)  |
| O7-M4-O11  | 89.26(14)  | 89.88(17)  |
| O10-M4-O8  | 90.88(15)  | 92.47(17)  |
| O7-M4-O8   | 87.72(14)  | 86.05(16)  |
| O11-M4-O8  | 93.86(15)  | 94.38(18)  |
| O10-M4-N13 | 93.97(15)  | 94.41(16)  |
| O7-M4-N13  | 87.67(14)  | 87.35(15)  |
| O11-M4-N13 | 91.78(15)  | 90.71(17)  |
| O8-M4-N13  | 172.67(15) | 171.65(18) |
| O10-M4-N7  | 88.00(14)  | 87.89(15)  |
| O7-M4-N7   | 94.58(14)  | 95.62(16)  |
| O11-M4-N7  | 170.65(14) | 169.55(17) |
| O8-M4-N7   | 94.81(14)  | 94.86(17)  |

N13-M4-N7                      79.88(14)                      80.70(15)

i: (1)M = Ni; (2)M = Co

Table S2. Metal–Ligand Bond Lengths (Å) and Angles (°) in Complexes **3**.

|                          |            |                                          |            |
|--------------------------|------------|------------------------------------------|------------|
| Co1–O1                   | 2.034(3)   | Co1–O4 <sup>ii</sup>                     | 2.122(3)   |
| Co1–O4                   | 2.061(3)   | Co1–O5                                   | 2.156(4)   |
| Co1–O2                   | 2.069(4)   | Co1–O4 <sup>i</sup>                      | 2.080(3)   |
| O1–Co1–O4                | 172.62(14) | O2–Co1–O5                                | 88.15(16)  |
| O1–Co1–O2                | 88.11(13)  | O4 <sup>i</sup> –Co1–O5                  | 89.74(14)  |
| O4–Co1–O2                | 94.25(13)  | O2–Co1–O4 <sup>ii</sup>                  | 99.01(15)  |
| O1–Co1–O4 <sup>i</sup>   | 93.50(13)  | O4 <sup>i</sup> –Co1–O4 <sup>ii</sup>    | 82.87(13)  |
| O4–Co1–O4 <sup>i</sup>   | 84.38(13)  | O1–Co1–O5                                | 96.67(16)  |
| O2–Co1–O4 <sup>i</sup>   | 177.48(15) | O4–Co1–O5                                | 90.41(15)  |
| O1–Co1–O4 <sup>ii</sup>  | 92.27(13)  | O4 <sup>ii</sup> –Co1–O5                 | 168.73(14) |
| O4–Co1–O4 <sup>ii</sup>  | 80.45(15)  | Co1–O4–Co1 <sup>iii</sup>                | 96.51(13)  |
| Co1–O4–Co1 <sup>ii</sup> | 99.49(14)  | Co1 <sup>iii</sup> –O4–Co1 <sup>ii</sup> | 94.65(13)  |

Symmetry codes: (i)  $-y+1, x+1/2, -z+1$ ; (ii)  $-x+1/2, -y+3/2, z$ ; (iii)  $y-1/2, -x+1, -z+1$ .

Table S3. Metal–Ligand Bond Lengths (Å) and Angles (°) in Complex **4**.

|                                         |            |                                        |            |
|-----------------------------------------|------------|----------------------------------------|------------|
| Ni1-O1 <sup>i</sup>                     | 1.990(4)   | Ni1-O4                                 | 2.076(4)   |
| Ni1-O1                                  | 1.997(3)   | Ni1-O3                                 | 2.345(4)   |
| Ni1-O2 <sup>i</sup>                     | 2.029(5)   | Ni1-O4 <sup>ii</sup>                   | 2.045(4)   |
| Ni2-O4                                  | 2.077(3)   | O1-Ni1-O4                              | 95.94(16)  |
| O1 <sup>i</sup> -Ni1-O1                 | 172.78(9)  | O2 <sup>i</sup> -Ni1-O4                | 166.69(18) |
| O1 <sup>i</sup> -Ni1-O2 <sup>i</sup>    | 87.44(18)  | O4 <sup>ii</sup> -Ni1-O4               | 83.0(2)    |
| O1-Ni1-O2 <sup>i</sup>                  | 97.35(18)  | O1 <sup>i</sup> -Ni1-O3                | 102.43(15) |
| O1 <sup>i</sup> -Ni1-O4 <sup>ii</sup>   | 104.70(16) | O1-Ni1-O3                              | 72.44(15)  |
| O1-Ni1-O4 <sup>ii</sup>                 | 79.85(15)  | O2 <sup>i</sup> -Ni1-O3                | 88.27(18)  |
| O2 <sup>i</sup> -Ni1-O4 <sup>ii</sup>   | 100.13(19) | O4 <sup>ii</sup> -Ni1-O3               | 151.87(15) |
| O1 <sup>i</sup> -Ni1-O4                 | 79.26(15)  | O4-Ni1-O3                              | 95.03(16)  |
| O4 <sup>i</sup> -Ni2-O4                 | 82.17(15)  | O4 <sup>ii</sup> -Ni2-O4 <sup>iv</sup> | 82.17(15)  |
| O4 <sup>ii</sup> -Ni2-O4 <sup>i</sup>   | 97.83(15)  | O4 <sup>i</sup> -Ni2-O4 <sup>iv</sup>  | 180.00(10) |
| O4-Ni2-O4 <sup>vi</sup>                 | 180.000(1) | Ni1 <sup>i</sup> -O4-Ni1               | 98.07(16)  |
| Ni1 <sup>ii</sup> -O1-Ni1               | 102.61(16) | Ni1 <sup>i</sup> -O4-Ni2               | 97.77(16)  |
| O4 <sup>iii</sup> -Ni2-O4 <sup>ii</sup> | 180.00(17) | Ni1-O4-Ni2                             | 96.81(17)  |

Symmetry codes: (i)  $x - y, x, -z + 2$ ; (ii)  $y, -x + y, -z + 2$ ; (iii)  $-y, x - y, z$ ; (iv)  $-x + y, -x, z$ .

Table S4. Metal–Ligand Bond Lengths (Å) and Angles (°) in Complex 5.

|                                         |             |                          |            |
|-----------------------------------------|-------------|--------------------------|------------|
| Co1-O1                                  | 2.021(4)    | Co1-O4                   | 2.108(4)   |
| Co1-O1 <sup>i</sup>                     | 2.029(4)    | O1 <sup>i</sup> -Co1-O4  | 79.00(14)  |
| Co1-O2 <sup>i</sup>                     | 2.062(5)    | O2 <sup>i</sup> -Co1-O4  | 165.28(17) |
| Co2-O4                                  | 2.129(4)    | O4 <sup>ii</sup> -Co1-O4 | 84.0(2)    |
| O1-Co1-O1 <sup>i</sup>                  | 171.78(9)   | O1-Co1-O3                | 71.49(14)  |
| O1-Co1-O2 <sup>i</sup>                  | 99.220(18)  | O1 <sup>i</sup> -Co1-O3  | 103.06(15) |
| O1 <sup>i</sup> -Co1-O2 <sup>i</sup>    | 86.37(17)   | O2 <sup>i</sup> -Co1-O3  | 86.12(18)  |
| O1-Co1-O4 <sup>ii</sup>                 | 79.90(15)   | O4 <sup>ii</sup> -Co1-O3 | 151.24(15) |
| O1 <sup>i</sup> -Co1-O4 <sup>ii</sup>   | 105.04(16)  | O4-Co1-O3                | 95.56(16)  |
| O2 <sup>i</sup> -Co1-O4 <sup>ii</sup>   | 101.54(18)  | O1-Co1-O4                | 95.19(16)  |
| O4-Co2-O4 <sup>i</sup>                  | 82.26(14)   | Co1-O1-Co1 <sup>ii</sup> | 102.82(14) |
| O4 <sup>ii</sup> -Co2-O4 <sup>i</sup>   | 97.74(14)   | Co1 <sup>i</sup> -O4-Co1 | 98.13(16)  |
| O4 <sup>iv</sup> -Co2-O4                | 180.00(18)  | Co1 <sup>i</sup> -O4-Co2 | 97.14(16)  |
| O4 <sup>iii</sup> -Co2-O4 <sup>i</sup>  | 82.29(13)   | Co1-O4-Co2               | 96.23(16)  |
| O4 <sup>iii</sup> -Co2-O4 <sup>ii</sup> | 180.000(17) |                          |            |

Symmetry codes: (i)  $y, -x+y, -z+1$ ; (ii)  $x-y, x, -z+1$ ; (iii)  $-x+y, -x, z$ ; (iv)  $-x, -y, -z+1$ .

Table S5. Hydrogen Bond Lengths (Å) and Angles (°) in Complexes 1.

| $D-H\cdots A$                     | $D-H$ | $H\cdots A$ | $D\cdots A$ | $D-H\cdots A$ |
|-----------------------------------|-------|-------------|-------------|---------------|
| N19-H19A $\cdots$ N6 <sup>i</sup> | 0.91  | 2.02        | 2.934(9)    | 176.8         |

Symmetry codes: (i)  $x-1, y, z$ .

Table S6. Hydrogen Bond Lengths (Å) and Angles (°) in Complexes 2

| $D-H\cdots A$                     | $D-H$ | $H\cdots A$ | $D\cdots A$ | $D-H\cdots A$ |
|-----------------------------------|-------|-------------|-------------|---------------|
| N19-H19A $\cdots$ N6 <sup>i</sup> | 0.91  | 2.02        | 2.929(12)   | 178.0         |

Symmetry codes: (i)  $x-1, y, z$ .

Table S7. Hydrogen Bond Lengths (Å) and Angles (°) in Complexes 3.

| $D-H\cdots A$                     | $D-H$ | $H\cdots A$ | $D\cdots A$ | $D-H\cdots A$ |
|-----------------------------------|-------|-------------|-------------|---------------|
| O5-H5B $\cdots$ O1 <sup>iii</sup> | 0.93  | 1.92        | 2.764(5)    | 149.7         |
| O5-H5B $\cdots$ O3 <sup>iii</sup> | 0.93  | 2.58        | 3.302(6)    | 134.3         |

Symmetry codes: (iii)  $y-1/2, -x+1, -z+1$ .
